# Supplementary material
Source: publisher figshare collection journal article supplement (https://acs.figshare.com/ndownloader/files/30774046)
Supplement: Supplementary file 1 [file 30774046]

**SO<sub>2</sub> poisoning mechanism of the multi-active center catalyst  
for chlorobenzene and NO<sub>x</sub> synergistic degradation at dry  
and humid environment**

Guobo Li<sup>a</sup>, Kai Shen<sup>a</sup>, Peng Wu<sup>a</sup>, Yaping Zhang<sup>a\*</sup>, Yaqin Hu<sup>a</sup>, Rui Xiao<sup>a\*</sup>, Bing Wang<sup>a</sup>,  
Shule Zhang<sup>b</sup>

a. Key Laboratory of Energy Thermal Conversion and Control of Ministry of  
Education, School of Energy and Environment, Southeast University, Nanjing, 210096,  
Jiangsu, P. R. China.

b. School of Chemical Engineering, Nanjing University of Science and Technology,  
Nanjing 210094, P. R. China.

*\*Corresponding author: Yaping Zhang, Email: [amflora@seu.edu.cn](mailto:amflora@seu.edu.cn), Telephone  
number: 86-025-8379066 and Rui Xiao, Telephone number: +86-025-83795726, Email:  
[ruixiao@seu.edu.cn](mailto:ruixiao@seu.edu.cn)*

## Content

| <b>Item</b>                                                   | <b>Page</b> |
|---------------------------------------------------------------|-------------|
| <b>2.1. Catalyst synthesis</b>                                | S3          |
| <b>2.2. Catalytic activity measurements</b>                   | S4-6        |
| <b>2.3. Catalyst Characterization</b>                         | S6-8        |
| <b>2.4. DFT calculations</b>                                  | S8-9        |
| <b>Reaction condition information</b>                         | S9          |
| <b>General properties of the multi-active center catalyst</b> | S9          |
| <b>Gaseous reaction by-products analysis</b>                  | S10         |
| <b>Raman analysis</b>                                         | S11         |
| <b>Fig.S1</b>                                                 | S12         |
| <b>Tab.S1</b>                                                 | S13         |
| <b>Tab.S2</b>                                                 | S14         |
| <b>Tab.S3</b>                                                 | S15         |
| <b>Fig.S2</b>                                                 | S16         |
| <b>Tab.S4</b>                                                 | S17         |
| <b>Fig.S3</b>                                                 | S18         |
| <b>Tab.S5</b>                                                 | S19         |
| <b>Fig.S4</b>                                                 | S20         |
| <b>Fig.S5</b>                                                 | S21         |
| <b>Fig.S6</b>                                                 | S22         |
| <b>Fig.S7</b>                                                 | S23         |
| <b>Fig.S8</b>                                                 | S24         |
| <b>Tab.S6</b>                                                 | S25         |
| <b>Fig.S9</b>                                                 | S26         |
| <b>Fig.S10</b>                                                | S27         |
| <b>Fig.S11</b>                                                | S28         |
| <b>Tab.S7</b>                                                 | S29         |
| <b>Fig.S12</b>                                                | S30         |
| <b>Fig.S13</b>                                                | S31         |
| <b>Fig.S14</b>                                                | S32         |
| <b>Fig.S15</b>                                                | S33         |
| <b>Fig.S16</b>                                                | S34         |
| <b>Fig.S17</b>                                                | S35         |
| <b>References</b>                                             | S36-37      |

## 2.1 Catalyst synthesis

The detailed preparation process of  $\text{Pd}_{0.12}\text{V}_4/\text{TiO}_2$  is as follows: 4.8 g  $\text{TiO}_2$  powder was added to 150 ml of deionized water, and the loading of metal oxide based on atom mass ratios (%) of Pd and V to  $\text{TiO}_2$ , respectively. 0.0150 g  $\text{Pd}(\text{NO}_3)_2 \cdot n\text{H}_2\text{O}$ , 0.4593 g  $\text{NH}_4\text{VO}_3$  and 2.0000 g citric acid powder were measured and added. The prepared mixed solution was stirred at 65 °C until a gel, followed by drying at 105 °C for 8 h, and calcined at 500 °C for 5 h in static air. The obtained multi-active center catalyst was called  $\text{Pd}_{0.12}\text{V}_4/\text{TiO}_2$  catalyst, simplified as  $\text{PdV}/\text{TiO}_2$  catalyst. The active component loading rate of the prepared catalyst was tested by inductively coupled plasma mass spectrometry (ICP-MS).

Citric acid, palladium nitrate, ammonium metavanadate, and anatase titanium dioxide (> 99.9 %) were all purchased from Aladdin Reagent Co., Ltd and used as is.

In situ poisoning of the Fresh catalyst was performed using a fixed bed quartz reactor for 24 h at 300 °C. The inlet gas mixture contained (600 ppm) CB, (600 ppm)  $\text{NH}_3$ , (600 ppm) NO, (600 ppm)  $\text{SO}_2$ , 10 vol. %  $\text{O}_2$  with or without of 10 vol. %  $\text{H}_2\text{O}$  and  $\text{N}_2$  as balance. The obtained poisoned catalyst samples could be denoted as Used-H and Used-S, respectively.

Regeneration of poisoned catalysts was performed with the same fixed bed quartz reactor. The catalysts were heated to and kept at 400 °C for 60 min. The inlet gas is only  $\text{N}_2$ . The obtained corresponding poisoned catalyst samples were denoted as Used- $\text{R}_\text{H}$  and Used- $\text{R}_\text{S}$ .

## 2.2 Catalytic activity measurements

CBCO+SCR activities of the prepared catalysts are conducted in a continuous flow fixed-bed quartz reactor. The inner diameter of reactor is 8 mm and the amount of catalyst used in each experiment is approximately 100 mg (40-60 meshes). The inlet gas mixture contained (600 ppm) CB, (600 ppm) NH<sub>3</sub>, (600 ppm) NO, 10 vol. % O<sub>2</sub> with or without of (600 ppm) SO<sub>2</sub> and 10 vol. % H<sub>2</sub>O and N<sub>2</sub> as balance, and gas hourly space velocity (GHSV) is 30 000 ml·g<sup>-1</sup>·h<sup>-1</sup>. The experiments are conducted at an atmospheric pressure of 100-400 °C, and catalysts were stabilized for 30 min at each temperature. The gas concentrations (NO, NO<sub>2</sub>, CO, CO<sub>2</sub> and O<sub>2</sub>) at the inlet and outlet are detected by flue gas analyzer, while CB and by-products are detected by gas chromatography (GC) equipped with FID. The blank experiment is carried out by using only quartz reactor, and no CB conversion is detected at 400 °C, indicating that CB cannot be oxidized destruction in the selected working condition in absence of a catalyst. The feed gas is mixed to preheat in a chamber before entering the reactor. The Weisz-Prater Criterion was used for testing the effect of internal diffusion, which is as followed:

If  $C_{wp} = \frac{-r'_{A(ops)} \rho_c R p^2}{De C_{As}} < 1$ , then internal mass transfer effects can be neglected.

$-r'_{A(ops)}$  = observed reaction rate, kmol/kg -cat·s

R = catalyst particle radius, m

$\rho_c$  = solid catalyst density, kg/m<sup>3</sup>; [ $\rho_c$ , anatase = 4000 kg/m<sup>3</sup>]

$De$  = effective gas-phase diffusivity, m<sup>2</sup>/s;  $= \frac{D_{AB} \phi_p \sigma_c}{\tau}$

where  $D_{AB}$  = gas-phase diffusivity m<sup>2</sup>/s;  $\phi_p$  = pellet porosity;  $\sigma_c$  = constriction factor;

$\tau$  = tortuosity.  $C_{As}$  = gas concentration of A at the catalyst surface, kmol–A/m<sup>3</sup>



$$C_{wp} = \frac{-r'_A(\text{obs})r_c R^2}{De C_{As}} = [1 \times 10^{-6} \text{ kmol/kg} \cdot \text{s}] \times [4 \times 10^3 \text{ kg/kgm}^3] \times [1.5 \times 10^{-4} \text{ kg/kgm}^3] / [2.6 \times 10^{-4} \text{ m}^2/\text{s}] [8.5 \times 10^{-5} \text{ kmol/m}^3] = 0.416 < 1$$

Thus, the internal mass transfer effects can be neglected.

The CB conversion, NO<sub>x</sub> conversion, CO<sub>2</sub> selectivity and N<sub>2</sub> selectivity for the Pd<sub>x</sub>V<sub>y</sub>/TiO<sub>2</sub> catalysts are calculated according to eq.1-4:

$$CB_{\text{Conversion}} = \frac{C(\text{CB})_{\text{in}} - C(\text{CB})_{\text{out}}}{C(\text{CB})_{\text{in}}} \times 100\% \quad (1)$$

$$NO_{x\text{Conversion}} = \frac{C(\text{NO}_x)_{\text{in}} - C(\text{NO}_x)_{\text{out}}}{C(\text{NO}_x)_{\text{in}}} \times 100\% \quad (2)$$

$$CO_{2\text{Selectivity}} = \frac{C(\text{CO}_2)_{\text{out}} - C(\text{CO}_2)_{\text{in}}}{6 \cdot C(\text{CB})_{\text{in}}} \times 100\% \quad (3)$$

$$N_{2\text{Selectivity}} = 1 - \frac{2C(\text{N}_2\text{O})_{\text{out}}}{C(\text{NO}_x)_{\text{in}} + C(\text{NH}_3)_{\text{in}} - C(\text{NO}_x)_{\text{out}} - C(\text{NH}_3)_{\text{out}}} \times 100\% \quad (4)$$

where, CB<sub>Conversion</sub>, NO<sub>x</sub>Conversion, N<sub>2</sub>Selectivity and CO<sub>2</sub>Selectivity represent CB conversion, NO<sub>x</sub> conversion, N<sub>2</sub> selectivity and CO<sub>2</sub> selectivity, respectively. The C(CB)<sub>in</sub>, C(CO<sub>2</sub>)<sub>in</sub>, C(NH<sub>3</sub>)<sub>in</sub> and C(NO<sub>x</sub>)<sub>in</sub> represent the concentration of inlet CB, CO<sub>2</sub>, NH<sub>3</sub> and NO<sub>x</sub>, respectively. C(CB)<sub>out</sub>, C(NO<sub>x</sub>)<sub>out</sub>, C(NH<sub>3</sub>)<sub>out</sub>, C(CO)<sub>out</sub>, C(N<sub>2</sub>O)<sub>out</sub>, and C(CO<sub>2</sub>)<sub>out</sub> represent the concentration of outlet CB, NO<sub>x</sub>, NH<sub>3</sub>, CO, N<sub>2</sub>O and CO<sub>2</sub>, respectively.

Additionally, it is very difficult to establish Cl balance in CBCO reaction. Since the HCl generated in the reaction is preferentially adsorbed on stainless steel pipe at the end of reactor, there is little HCl in the outflow gas, so it is very difficult to quantify.

Assuming that the CBCO reaction in the presence of excess O<sub>2</sub> would follow the first-order reaction mechanism for CB concentration (c):  $r = -kc = (-A \exp(-E_a/RT)) \cdot c$ , where r, k, A, and E<sub>a</sub> are reaction rate (mol/s), rate constant (s<sup>-1</sup>), pre-exponential factor, and apparent activation energy (kJ·mol<sup>-1</sup>), respectively. Arrhenius curves of different

catalysts with CB conversion at <20% at GHSV at 600 000 h<sup>-1</sup> in the full testing temperature range to ensure a kinetic regime. The detailed information of test results with the influence of internal and external diffusion eliminated is shown in Fig.S1.

The apparent E<sub>a</sub> of PdV/TiO<sub>2</sub> catalyst is estimated by the calculation of temperature dependent reaction, and the CB conversion involved in Fig.S1 is lower than 20% to avoid diffusion limitations. As calculated, E<sub>a</sub> values of the four obtained catalysts are displayed in Fig.S1, which indicates that the coexistence of Pd and V oxides are beneficial to CBCO and NH<sub>3</sub>-SCR.

Turnover frequency (TOF) under different working conditions was calculated according to the transformed mole number of CB (or NO) per second on per mole of Pd center.  $TOF = \text{CB (or NO) concentration} \times \text{flow} \times \text{conversion rate} / (22.4 \times \text{Pd content} \times 60)$ , in which CB (or NO) concentration and volumetric flow were 600 ppm and 300 mL/min, respectively, Pd content was calculated according to ICP-MS result.

### 2.3 Catalyst Characterization

High-resolution transmission electron microscope (HRTEM) images and energy dispersive X-ray spectrometer (EDX) were conducted on Talos F200X microscope operating at an acceleration voltage of 200 kV. X-ray fluorescence (XRF) spectrums were carried out by Bruker S4 Explorer instrument. Powder X-ray diffraction (XRD) patterns were recorded using a Rigaku D/max-2500 diffractometer with Cu K $\alpha$  radiation source operating at 30 kV. The diffraction patterns were collected over the 2 $\theta$  range of 10°~80° with a scan speed of 5°·min<sup>-1</sup>. The N<sub>2</sub> adsorption-desorption experiments were carried out at liquid N<sub>2</sub> temperature (-196 °C) using a V-Sorb2800P

(Micromeritics ASAP2460, USA) specific surface area and pore size analyzer. The specific surface areas were calculated from N<sub>2</sub> adsorption isotherms by applying the Brunauer-Emmett-Teller (BET) model.<sup>1</sup> Micropore volume and micropore diameter of the catalyst samples were measured by t-plot analyses.<sup>2</sup>

O<sub>2</sub> temperature programmed desorption (O<sub>2</sub>-TPD) and H<sub>2</sub> temperature programmed reduction (H<sub>2</sub>-TPR) analysis were all conducted in a quartz U-tube reactor connected to an AutoChem1 II 2920 instrument. For TPD measurements, 70 mg of catalyst sample and O<sub>2</sub>-He, as adsorbent, were used. The sample was first pretreated in a flow rate of 10 ml/min O<sub>2</sub> and 30 ml/min He at 300 °C. After adsorption saturation, He was purged at 30 ml/min until the TCD detector signal became stable, then, the atmosphere temperature was increased from 100 to 600 °C in a He atmosphere (with a 30 ml/min flow) for desorption, and recording the work curve. Prior to the TPR measurements, a catalyst sample (20 mg) was pretreated at 200 °C for 30 min in high-purity Ar (20 ml/min) and maintain for 35 min, then, cooling down to room temperature. H<sub>2</sub> is introduced at a flow rate of 20 ml/min, subsequently, atmosphere temperature was raised to 800 °C at a rate of 10 °C/min for temperature-programmed reduction, the signal was collected using TCD detector to obtain a H<sub>2</sub>-TPR pattern.

X-ray photoelectron spectroscopy (XPS) was performed on a Thermo Scientific K-Alpha<sup>+</sup> using Al K $\alpha$  as the radiation source. The binding energy for Ti 2*p*, V 2*p*, O 1*s*, Pd 3*d* and S 2*p* was corrected by the surface energy contamination C 1*s* binding energy peak at 284.8 eV. The actual active metal components were analyzed by ICP-MS with a PerkinElmer NexION 300X spectrometer (USA). Catalyst samples were pre-

dissolved with the help of aqua regia to form a homogeneous solution.

In situ DRIFT (diffuse reflectance infrared Fourier transform) spectra of CB/O<sub>2</sub>/NH<sub>3</sub>/NO/NO<sub>2</sub> adsorption was conducted on Nicolet6700 spectrometer (Thermo Electron Corporation, USA), with running in the wavenumber ranged 1200-2000 cm<sup>-1</sup> at a resolution of 4 cm<sup>-1</sup> (32 scans are taken for each spectrum). The obtained differential catalyst sample spectra were calculated by the Kubelka-Munk function.

## 2.4. DFT calculations

During all the adsorption calculations, the kinetic energy cutoff was 500 eV.<sup>3</sup> The crystal structure of TiO<sub>2</sub>, has tetragonal symmetry with a space group of mp-390. Owing to the large size of slab model (22.23 Å×14.29 Å×20.82 Å), a Gamma-Centered 1×1×1 mesh was adopted for the Brillouin zone integration. The geometry optimization has been performed with the wholead-molecule model relaxing. An at least 20 Å thick vacuum layer in the z-direction is added to simulate surfaces to ensure the reaction will not be influenced by next layer. The convergence criteria for electronic geometry relaxation were set to 10<sup>-4</sup> eV and 0.01 eV/Å, respectively. Adsorption is only allowed on one side of the exposed surface, with the dipole moment corrected accordingly in the z-direction. The adsorption energy ( $E_{ads}$ ) of reaction gas on PdV/TiO<sub>2</sub> (101) surface were calculated by using Eq.5:

$$E_{ads}=E_{gas-structure}-(E_{gas}+E_{structure}) \quad (5)$$

where  $E_{ads}$ ,  $E_{structure}$  and  $E_{gas}$  is the total energy of adsorbed reaction gas over PdV/TiO<sub>2</sub> structure (101) surface, interacting PdV/TiO<sub>2</sub> structure (101) surface, and the isolated gas molecules in vacuum, respectively.

The reaction energy ( $E_r$ ) is defined as Eq.6:

$$E_r = E_{FS} - E_{IS} \quad (6)$$

where  $E_{IS}$  and  $E_{FS}$  is the energy of initial state and final state, respectively.

#### **Reaction condition information**

CBCO: 600 ppm CB + 10 vol.% O<sub>2</sub>

SCR: 600 ppm NO + 600 ppm NH<sub>3</sub> + 10 vol.% O<sub>2</sub>

CBCO+SCR: 600 ppm CB + 600 ppm NO + 600 ppm NH<sub>3</sub> + 10 vol.% O<sub>2</sub>

#### **General properties of the multi-active center catalyst**

The general properties of multi-active center catalyst are listed in Fig.S1 and Tab.S1. The structural and morphological properties of it were analyzed by HRTEM (Fig.S1a-b), the lattice spacing was measured to be 0.35, 0.19 and 0.17 nm, which are in good agreement with that of the (101), (200) and (211) crystal plane of the standard TiO<sub>2</sub> (JCPDS PDF# 73-1764). Surface *Brønsted* and *Lewis* acidic sites of the catalyst is probed by Pyridine-IR spectra at 300 °C, which is 29.23 and 202.46 μmol/mg respectively, indicating that there are abundant acid sites on the catalyst surface. Pd dispersion on the multi-active center catalyst surface is determined from H<sub>2</sub>-O<sub>2</sub> pulsed chemisorption, it is about 0.135%. The detected Pd and V molar ratio of the multi-active center catalyst are 0.112% and 3.606%, respectively, and the results indicating that TiO<sub>2</sub> supported the two active components well. The BET specific surface area of multi-active center catalyst measured at 56.35 m<sup>2</sup>·g<sup>-1</sup>.

## Gaseous reaction by-products analysis

Catalytic stability performance of the multi-active center catalyst in different reaction conditions is also test within 24 hours at 300 and 400 °C, respectively. As shown in Fig.S3, the main active centers are more likely to be occupied or overridden by S species at lower temperature (300 °C), especially in humid environment. It is not conducive to the deposition of sulfur species on the catalyst surface at higher temperature (400 °C), while the competitive adsorption between SO<sub>2</sub> (or H<sub>2</sub>O) and each reaction gas molecule (CB, O<sub>2</sub>, NH<sub>3</sub> and NO<sub>x</sub>) still exists on the catalyst surface. This may be the reason for a slightly less in catalytic activity at 400 °C than that condition without SO<sub>2</sub>. In addition, 400 °C may be a suitable regeneration temperature for SO<sub>2</sub> poisoning catalysts. The numerical difference between CB conversion and CO<sub>2</sub> selectivity indicated that a part of CB is not completely oxidized to CO<sub>2</sub> during CBCO reaction, which was converted to organic by-products. As shown in Fig.S2, when the reaction equilibrium is achieved at 300 °C, any residual compounds were performed quantitative identify in a calibrated GC-MS system after capturing the reaction exhaust gases, a small amount of polychlorinated by-products (mainly dichloromethane, 1,4-dichlorobenzene, 1,2-dichlorobenzene) and unconverted CB were detected in the three conditions. The generated polychlorinated by-products may be formed from PdCl<sub>x</sub> that provided active *Lewis* acidic sites for electrophilic chlorination reaction.<sup>4</sup> Due to the occupation of Pd sites by sulfur species, the adsorption and deep oxidation reaction of transient organic intermediates to CO<sub>2</sub> and H<sub>2</sub>O on catalyst surface are hindered. Thus, the organic by-products increase.

## **Raman analysis**

Raman spectroscopy is used to study the oligomerization process of  $\text{PdO}_x$  and  $\text{VO}_x$  species on  $\text{TiO}_2$  surface and the changes after sulfur and the subsequent thermal regeneration process. Fig.S5 exhibits the Raman spectra of Fresh, Used-S, Used-H, Used-R<sub>S</sub>, and Used-R<sub>H</sub> catalysts, all spectra are dominated by vibrational fingerprints of anatase- $\text{TiO}_2$  at 396.06, 513.90 and 636.37  $\text{cm}^{-1}$ .

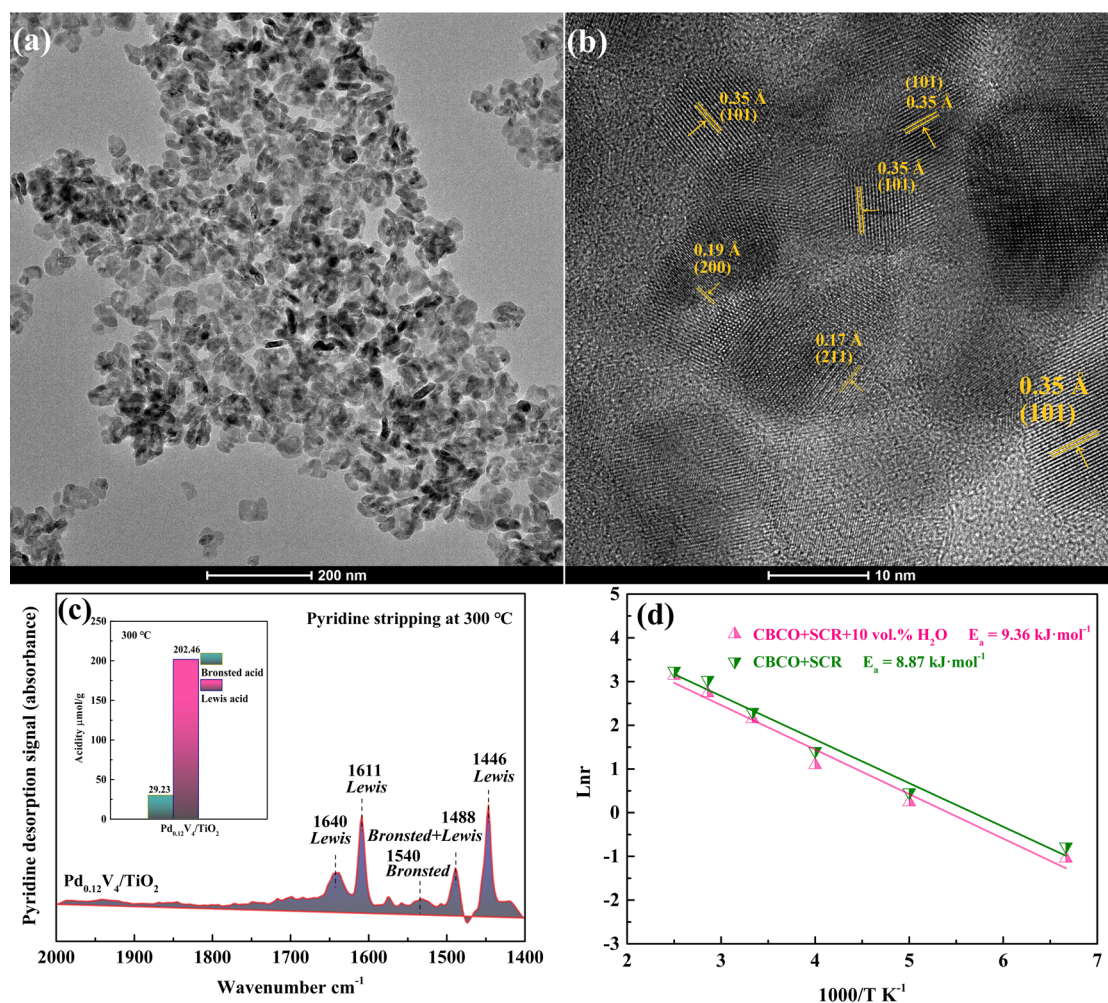

**Fig.S1** HRTEM image (a-b) and Pyridine-IR profile (c) analyzed at 300 °C of  $\text{Pd}_{0.12}\text{V}_4/\text{TiO}_2$  catalyst.



198

**Tab.S1** Basic information of Pd<sub>0.12</sub>V<sub>4</sub>/TiO<sub>2</sub> catalyst.

| Catalyst                                            | Pd dispersion <sup>a</sup> | Pd molar ratio <sup>b</sup> | V molar ratio <sup>b</sup> | S <sub>total</sub> <sup>c</sup> |
|-----------------------------------------------------|----------------------------|-----------------------------|----------------------------|---------------------------------|
| samples                                             | (%)                        | (%)                         | (%)                        | (m <sup>2</sup> /g)             |
| Pd <sub>0.12</sub> V <sub>4</sub> /TiO <sub>2</sub> | 0.135                      | 0.112                       | 3.606                      | 56.35                           |

199

S<sub>total</sub>: total BET surface area.

200

a: Determined from H<sub>2</sub>-O<sub>2</sub> pulsed chemisorption.

201

b: Determined by ICP-MS and XPS.

202

c: BET specific surface area are determined from the linear part of the BET equation (P/P<sub>0</sub>=0.05-

203

0.99).

204 **Tab.S2** The CB turnover frequency (TOF) on Pd<sub>0.12</sub>V<sub>4</sub>/TiO<sub>2</sub> catalyst surface with  
 205 different conditions

| Test temperatures | CBCO+SCR               | CBCO+SCR+600                     | CBCO+SCR+600 ppm SO <sub>2</sub> +10 |
|-------------------|------------------------|----------------------------------|--------------------------------------|
| (°C)              | (CB) (mol/s)           | ppm SO <sub>2</sub> (CB) (mol/s) | vol.% H <sub>2</sub> O (CB) (mol/s)  |
| 100               | 0.399×10 <sup>-6</sup> | 0.349×10 <sup>-6</sup>           | 0.309×10 <sup>-6</sup>               |
| 150               | 0.149×10 <sup>-5</sup> | 0.798×10 <sup>-6</sup>           | 0.778×10 <sup>-6</sup>               |
| 200               | 0.319×10 <sup>-5</sup> | 0.229×10 <sup>-5</sup>           | 0.212×10 <sup>-5</sup>               |
| 250               | 0.558×10 <sup>-5</sup> | 0.459×10 <sup>-5</sup>           | 0.435×10 <sup>-5</sup>               |
| 300               | 0.997×10 <sup>-5</sup> | 0.878×10 <sup>-5</sup>           | 0.826×10 <sup>-5</sup>               |
| 350               | 8.75×10 <sup>-5</sup>  | 4.88×10 <sup>-5</sup>            | 3.64×10 <sup>-5</sup>                |
| 400               | 9.94×10 <sup>-5</sup>  | 9.94×10 <sup>-5</sup>            | 9.90×10 <sup>-5</sup>                |

206

207 **Tab.S3** The NO turnover frequency (TOF) on Pd<sub>0.12</sub>V<sub>4</sub>/TiO<sub>2</sub> catalyst surface with  
 208 different conditions

| Test temperatures | CBCO+SCR              | CBCO+SCR+600 ppm             | CBCO+SCR+600 ppm SO <sub>2</sub> +10 |
|-------------------|-----------------------|------------------------------|--------------------------------------|
| (°C)              | (NO) (mol/s)          | SO <sub>2</sub> (NO) (mol/s) | vol.% H <sub>2</sub> O (NO) (mol/s)  |
| 100               | 5.68×10 <sup>-6</sup> | 2.29×10 <sup>-6</sup>        | 0.398×10 <sup>-6</sup>               |
| 150               | 1.43×10 <sup>-5</sup> | 7.97×10 <sup>-6</sup>        | 0.698×10 <sup>-6</sup>               |
| 200               | 7.61×10 <sup>-5</sup> | 5.58×10 <sup>-5</sup>        | 0.558×10 <sup>-5</sup>               |
| 250               | 9.96×10 <sup>-5</sup> | 8.50×10 <sup>-5</sup>        | 0.867×10 <sup>-5</sup>               |
| 300               | 9.96×10 <sup>-5</sup> | 9.87×10 <sup>-5</sup>        | 1.83×10 <sup>-5</sup>                |
| 350               | 9.96×10 <sup>-5</sup> | 9.90×10 <sup>-5</sup>        | 3.64×10 <sup>-5</sup>                |
| 400               | 9.46×10 <sup>-5</sup> | 8.01×10 <sup>-5</sup>        | 9.74×10 <sup>-5</sup>                |

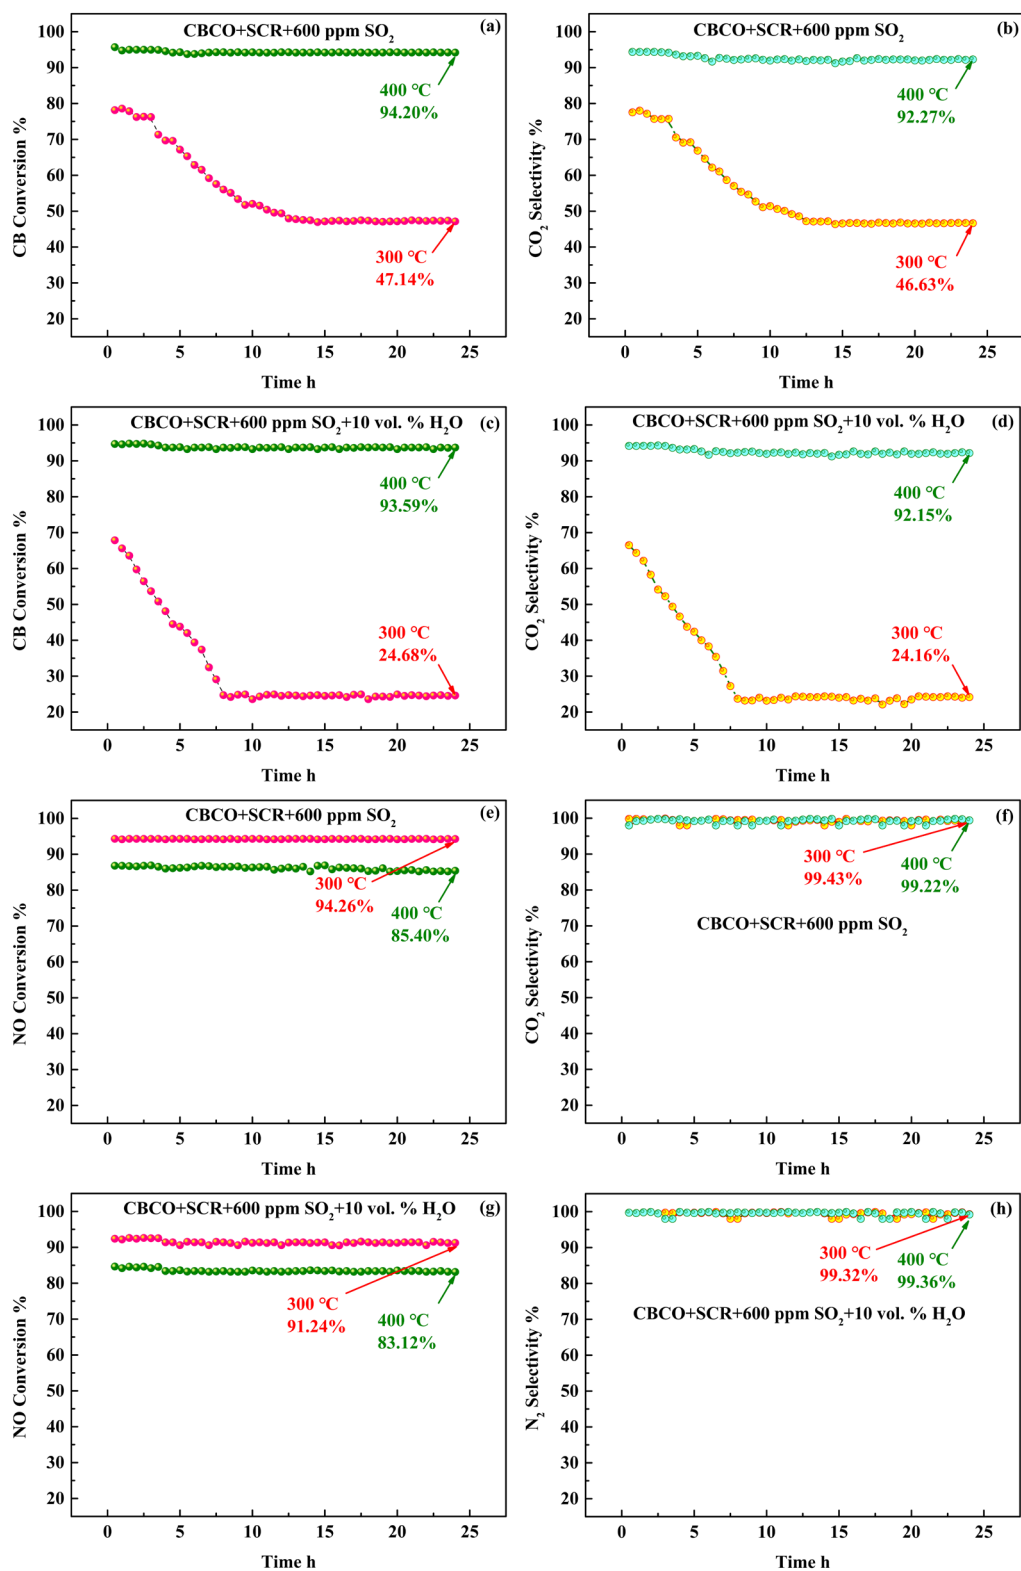

**Fig.S2** Effect of 600 ppm SO<sub>2</sub> on CB/NO conversion (a, c, e, g) and CO<sub>2</sub>/N<sub>2</sub> selectivity (b, d, f, h) with 24 h in dry and humid (with 10 vol.% H<sub>2</sub>O in) environment at 300 and 400 °C, respectively.

213 **Tab.S4** Products in the off Gases from CB oxidation under different stable conditions

| No. | Compound name       | Molecular formula                 | Molecular structure                                                                 |
|-----|---------------------|-----------------------------------|-------------------------------------------------------------------------------------|
| 1   | Methylene chloride  | $\text{CH}_2\text{Cl}_2$          |  |
| 2   | Chlorobenzene       | $\text{C}_6\text{H}_5\text{Cl}$   |   |
| 3   | 1,4-dichlorobenzene | $\text{C}_6\text{H}_4\text{Cl}_2$ |   |
| 4   | 1,2-dichlorobenzene | $\text{C}_6\text{H}_4\text{Cl}_2$ |  |

214

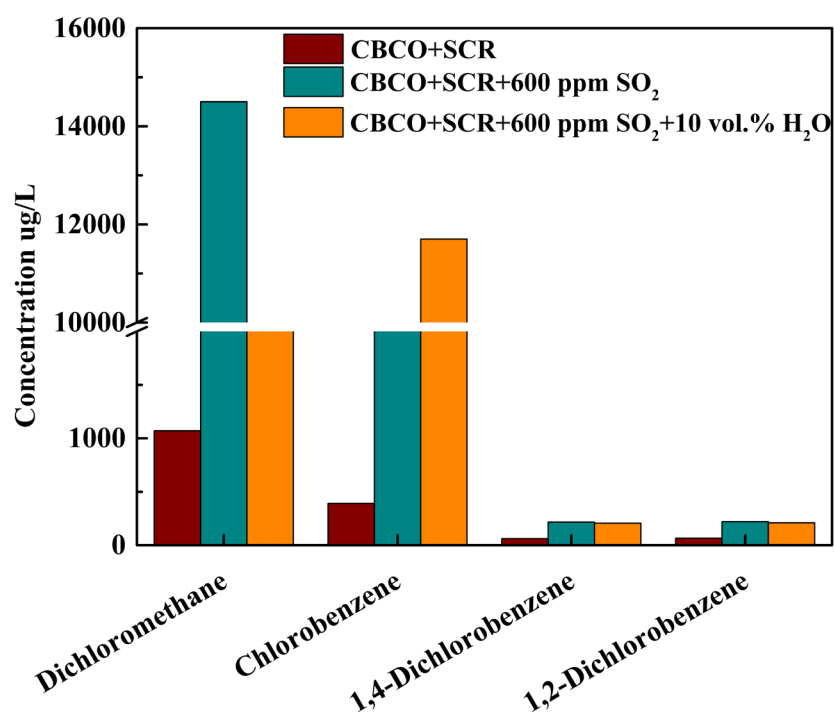

**Fig.S3** Gaseous compounds in exhaust gases at 300 °C for Pd<sub>0.12</sub>V<sub>4</sub>/TiO<sub>2</sub> catalyst under different conditions.

218 **Tab.S5** Physicochemical properties of different catalysts.

| Parameters          | Elemental analysis/Atom ratio (%) <sup>a</sup> |      |      | Porosity analysis                                   |                                      |
|---------------------|------------------------------------------------|------|------|-----------------------------------------------------|--------------------------------------|
|                     | S                                              | V    | Pd   | S <sub>total</sub> (m <sup>2</sup> /g) <sup>b</sup> | D <sub>Median</sub> (Å) <sup>c</sup> |
| Fresh               | -- <sup>d</sup>                                | 3.34 | 0.10 | 56.35                                               | 107.49                               |
| Used-S              | 3.39                                           | 3.28 | 0.08 | 48.15                                               | 107.52                               |
| Used-H              | 3.75                                           | 3.23 | 0.07 | 44.79                                               | 107.53                               |
| Used-R <sub>S</sub> | 1.22                                           | 3.31 | 0.09 | 55.44                                               | 107.50                               |
| Used-R <sub>H</sub> | 1.51                                           | 3.30 | 0.09 | 52.81                                               | 107.50                               |

219 D<sub>Median</sub>: Median pore diameter

220 *a*: Determined by XPS and SEM-EDX.

221 *b*: Determined from the linear part of the BET equation (P/P<sub>0</sub>=0.05-0.99).

222 *c*: Calculated from Horvath-Kawazoe.

223 *d*: Not determined.

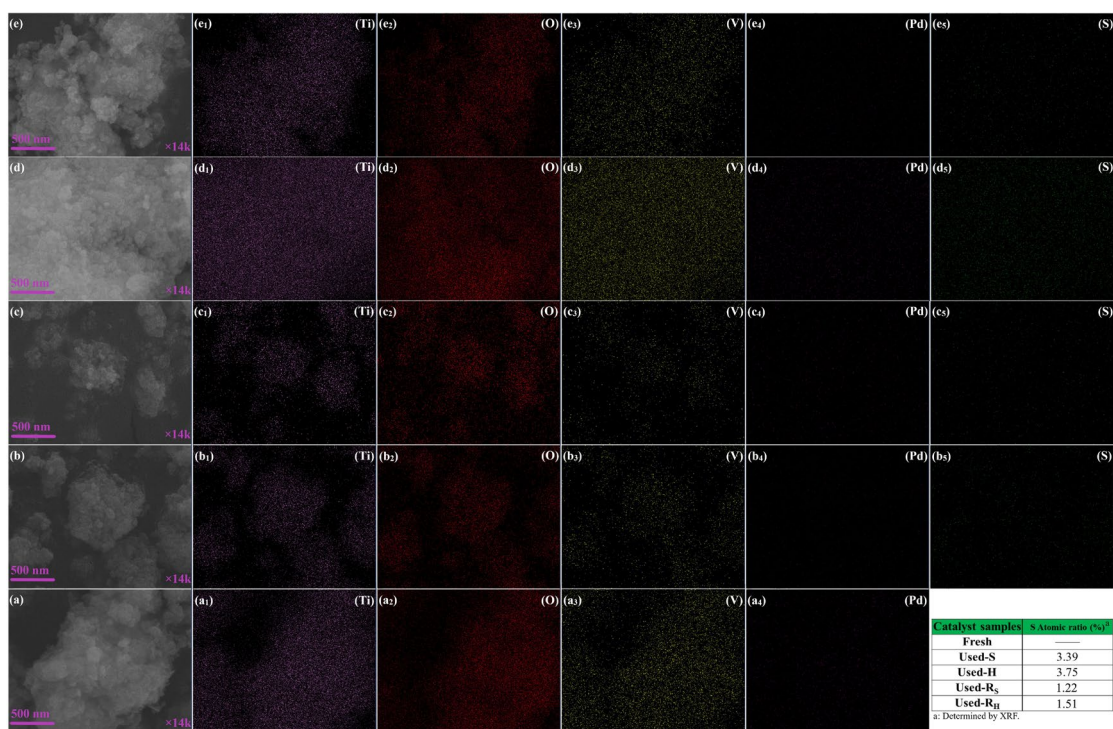

**Fig.S4** SEM-EDS mapping images (a-e) of Fresh, Used-S, Used-H, Used-R<sub>s</sub>, and Used-R<sub>H</sub> catalysts, respectively.



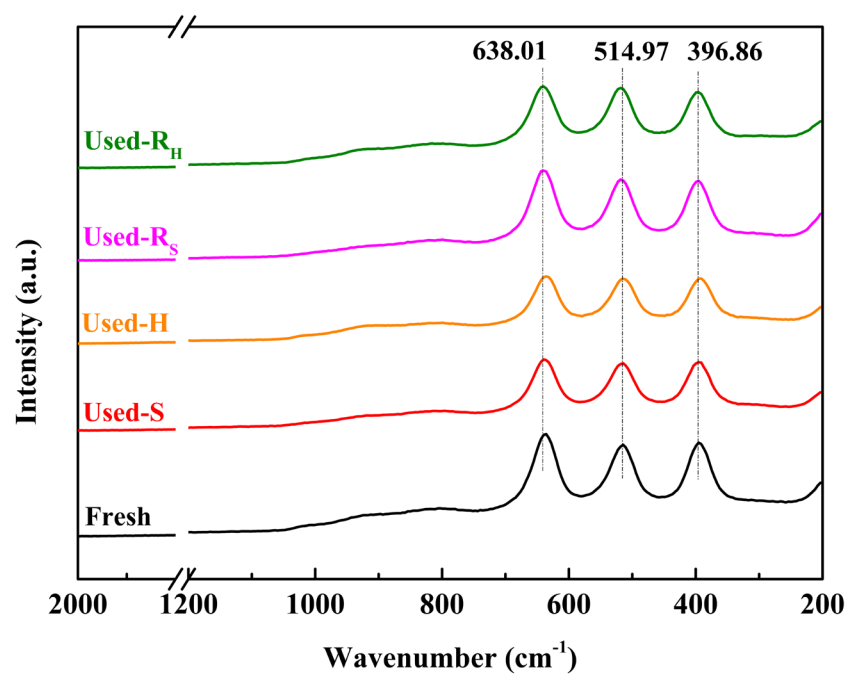

227

228 **Fig.S5** Raman spectra of Fresh, Used-S, Used-H, Used-R<sub>s</sub>, and Used-R<sub>H</sub> catalysts,

229 respectively.

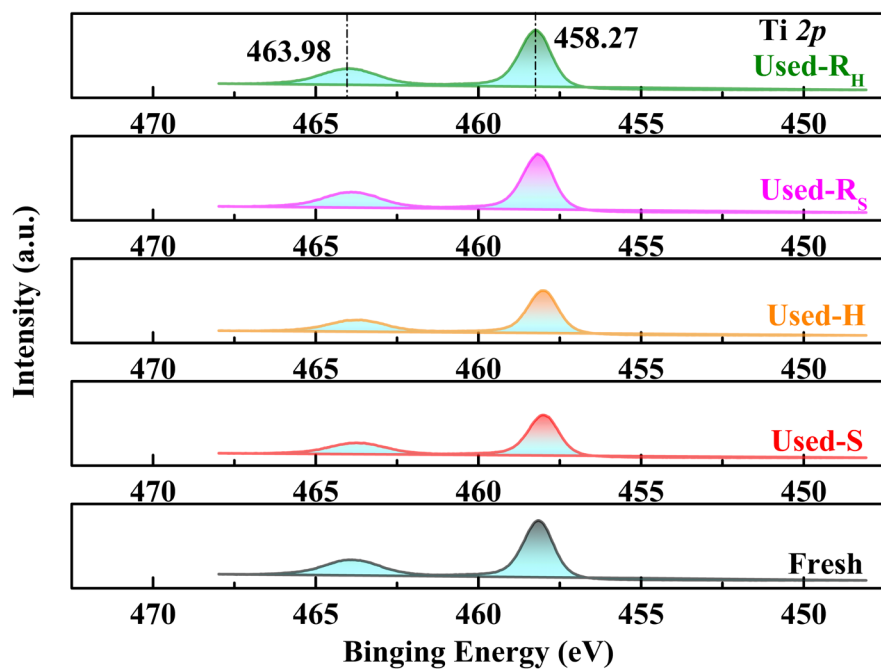

230

231 **Fig.S6** Ti 2p XPS profile of Fresh, Used-S, Used-H, Used-Rs and Used-R<sub>H</sub> catalysts.

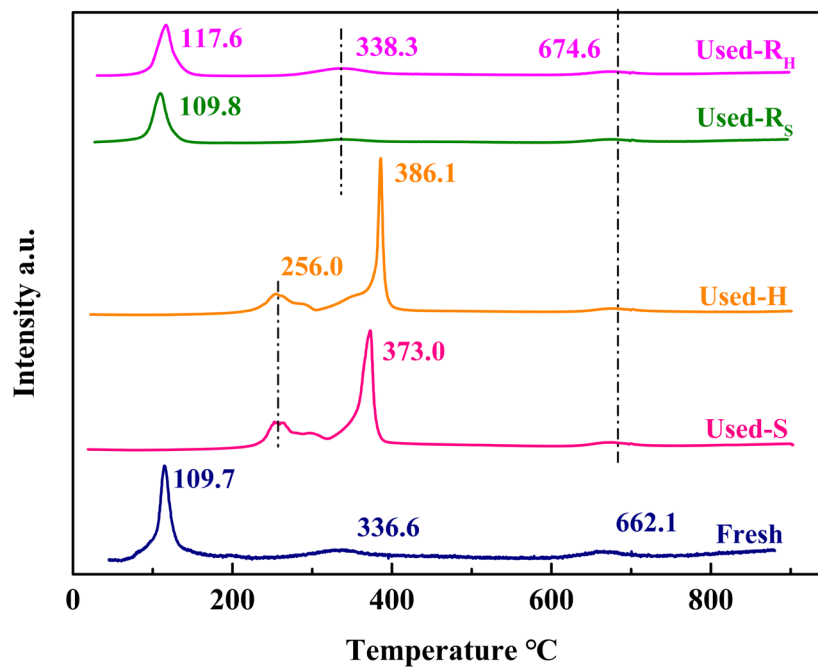

232

233 **Fig.S7** H<sub>2</sub>-TPR profiles of Fresh, Used-S, Used-H, Used-R<sub>S</sub>, and Used-R<sub>H</sub> catalysts.

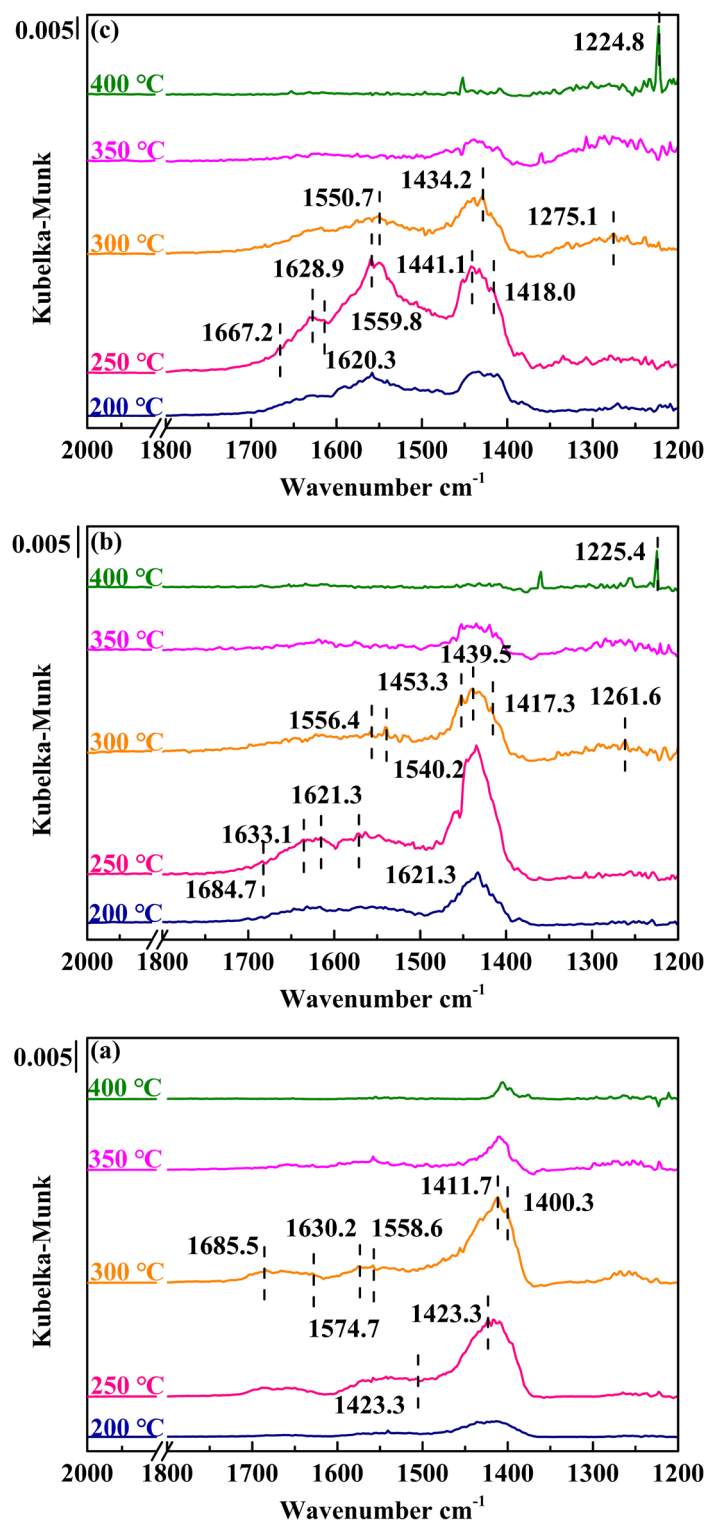

**Fig.S8** in situ DRIFT spectra in 1200-2000  $\text{cm}^{-1}$  region of different condition (a) CBCO+SCR, (b) CBCO+SCR+ 600 ppm  $\text{SO}_2$  and (c) CBCO+SCR+600 ppm  $\text{SO}_2$ +10 vol.%  $\text{H}_2\text{O}$  on  $\text{Pd}_{0.12}\text{V}_4/\text{TiO}_2$  from 200 to 400 °C after the treatment in  $\text{N}_2$  at 400 °C. (balanced by  $\text{N}_2$ ), respectively.

**Tab.S6** in situ DRIFT spectra peaks and their corresponding species

| Wavenumbers (cm <sup>-1</sup> )        | Species                                                               | References         |
|----------------------------------------|-----------------------------------------------------------------------|--------------------|
| 1224.8, 1225.4                         | Stretching motion of adsorbed sulfate                                 | <a href="#">4</a>  |
| 1261.6, 1275.1                         | Bidentate sulfates                                                    | <a href="#">5</a>  |
| 1400.3                                 | Asymmetric stretching vibration of carboxylates with the acetate type | <a href="#">6</a>  |
| 1411.7, 1417.3, 1418.0                 | NH <sub>4</sub> NO <sub>3</sub> species                               | <a href="#">7</a>  |
| 1423.3, 1434.2, 1439.5, 1441.1, 1453.3 | -N-N-O species                                                        | <a href="#">8</a>  |
| 1507.6                                 | Maleates                                                              | <a href="#">9</a>  |
| 1540.2, 1550.7, 1556.4, 1558.6, 1559.8 | -NH <sub>2</sub>                                                      | <a href="#">10</a> |
| 1571.2, 1574.7                         | Gas-phase CB                                                          | <a href="#">11</a> |
| 1620.3, 1621.3, 1630.2                 | Bridging nitrates                                                     | <a href="#">12</a> |
| 1628.9                                 | δ(HOH) of adsorbed H <sub>2</sub> O                                   | <a href="#">13</a> |
| 1630.2, 1633.1                         | Chlorinated pbenzoquinone-type                                        | <a href="#">14</a> |
| 1667.2, 1684.7, 1685.5                 | NH <sub>4</sub> <sup>+</sup> species                                  | <a href="#">15</a> |

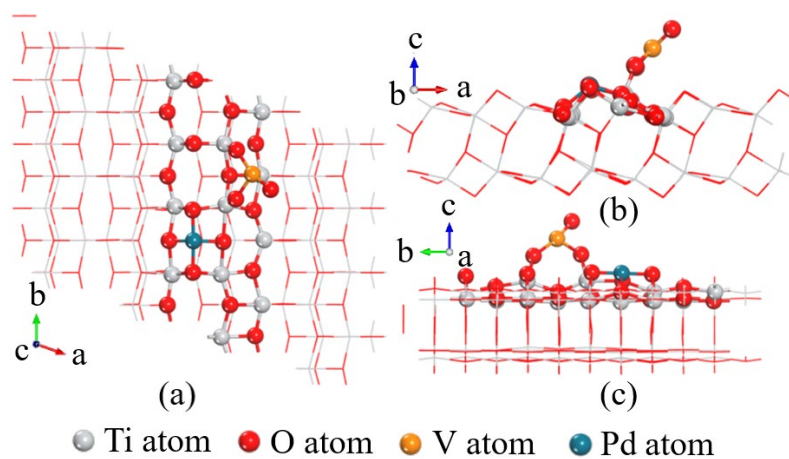

241

242 **Fig.S9** Top view (a) and side view (b and c) of optimized multi-active center catalyst

243 structure.

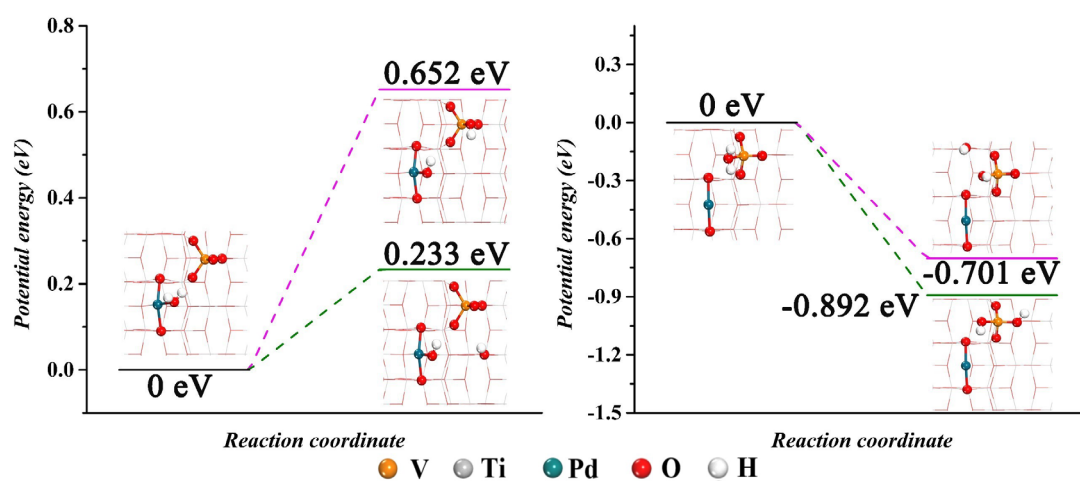

**Fig.S10** Dehydrogenation path for single adsorption of  $\text{H}_2\text{O}$  on the multi-active center catalyst surface.

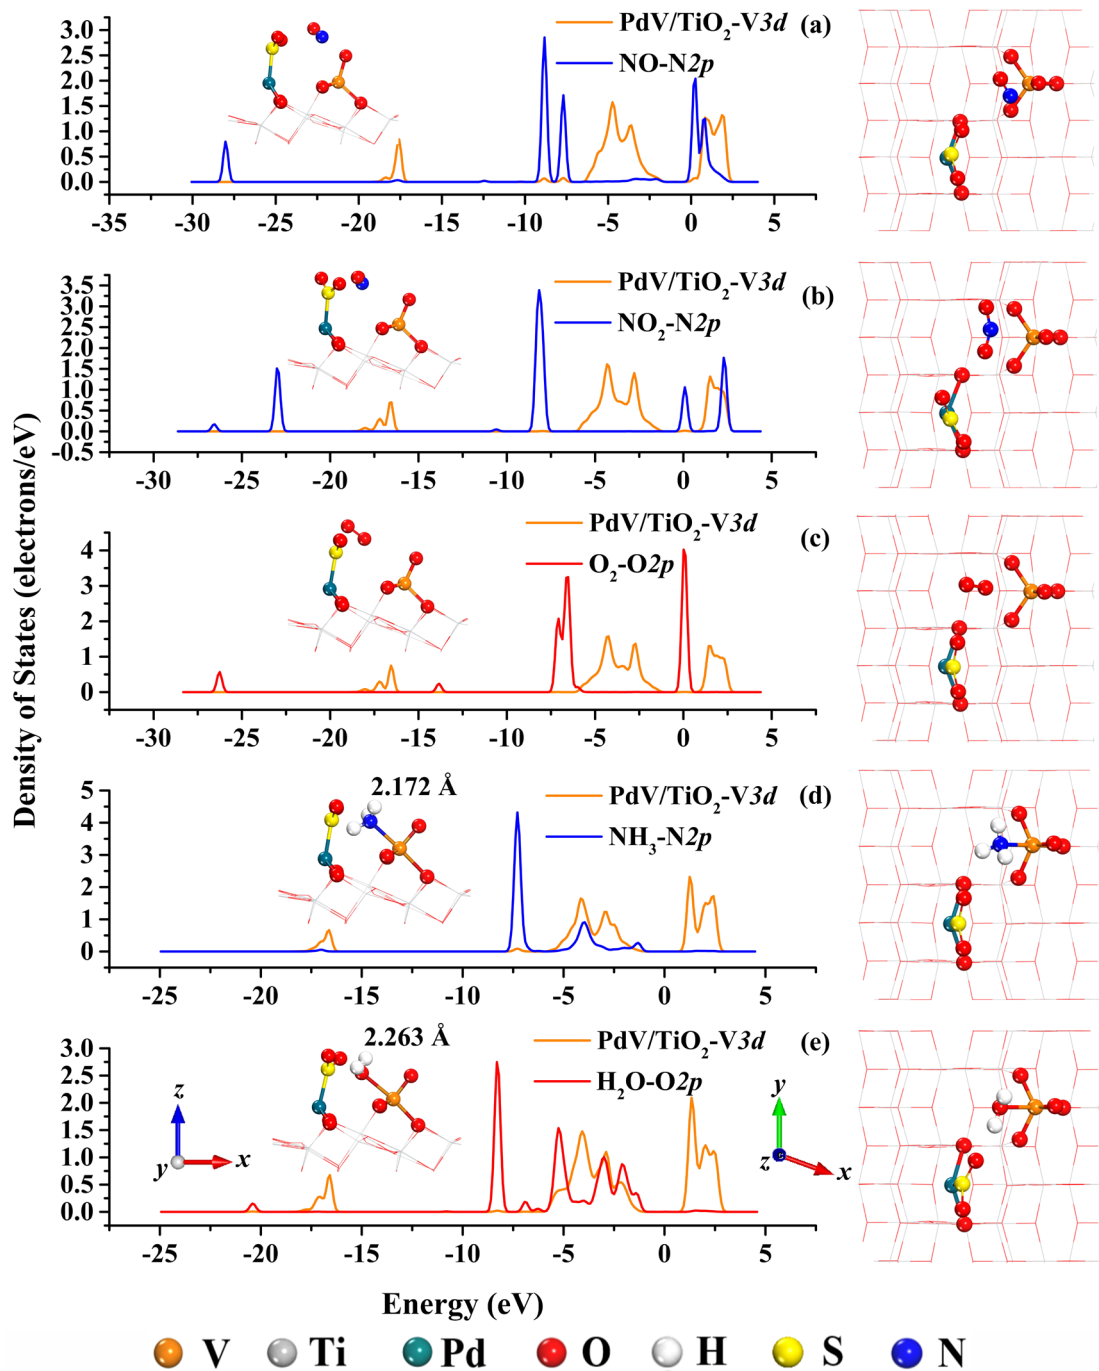

**Fig.S11** Co-adsorption configurations and PDOS of SO<sub>2</sub> with NO, NO<sub>2</sub>, O<sub>2</sub>, NH<sub>3</sub>, and H<sub>2</sub>O gas molecules on the multi-active center catalyst surface (a-e), respectively.



250 **Tab.S7** Adsorption energy and bond information of SO<sub>2</sub> with NO, NO<sub>2</sub>, O<sub>2</sub>, NH<sub>3</sub>, and

251 H<sub>2</sub>O gas molecules on the multi-active center catalyst surface

| Parameters                | NO <sub>2</sub>    | NO                 | O <sub>2</sub>     | NH <sub>3</sub> | H <sub>2</sub> O |
|---------------------------|--------------------|--------------------|--------------------|-----------------|------------------|
|                           | N                  | N                  | O                  | N               | O                |
| Gas adsorption end        | (-- <sup>a</sup> ) | (-- <sup>a</sup> ) | (-- <sup>a</sup> ) | (N-V)           | (O-V)            |
| Co-adsorption energy (eV) | --                 | --                 | --                 | -6.990          | -6.620           |
| Length of formed bond (Å) | --                 | --                 | --                 | 2.172           | 2.263            |
| Bond length of Cl–Pd (Å)  | --                 | --                 | --                 | 2.150           | 2.157            |

252 *a*: Does not adsorb on this active center.

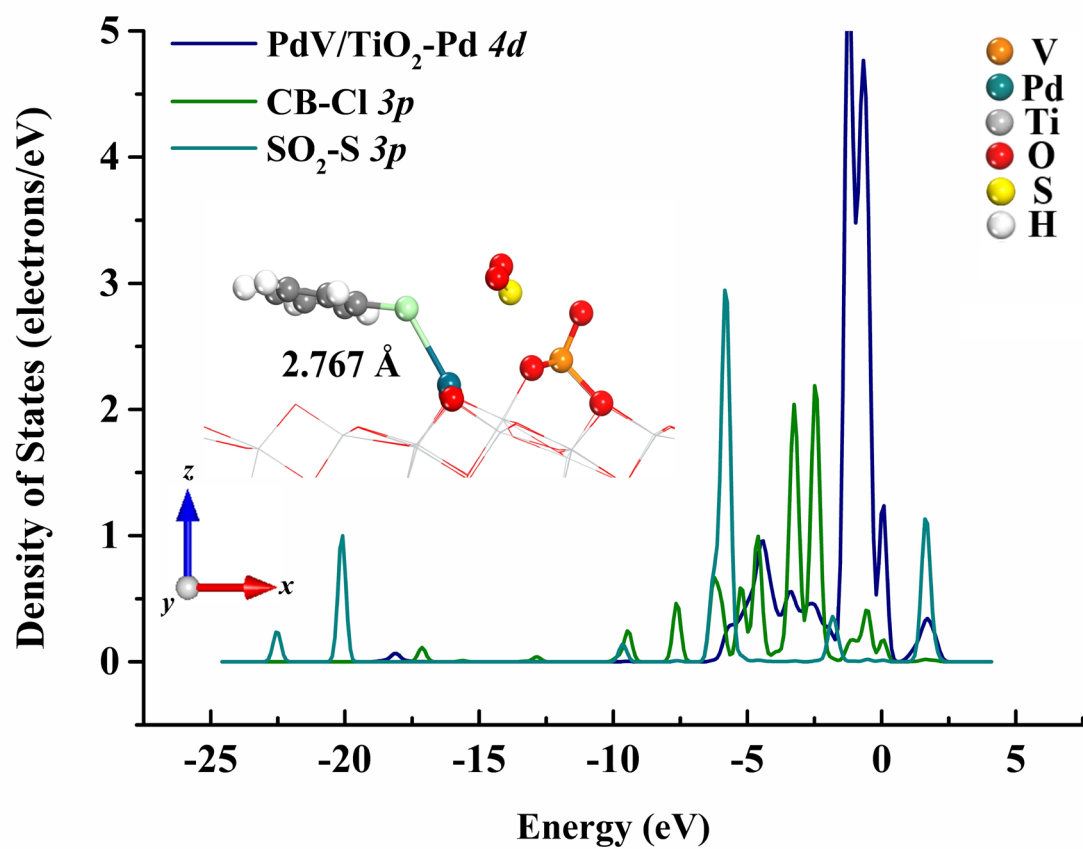

254

255 **Fig.S12** Competitive adsorption of CB and SO<sub>2</sub> on the multi-active center catalyst  
 256 surface.

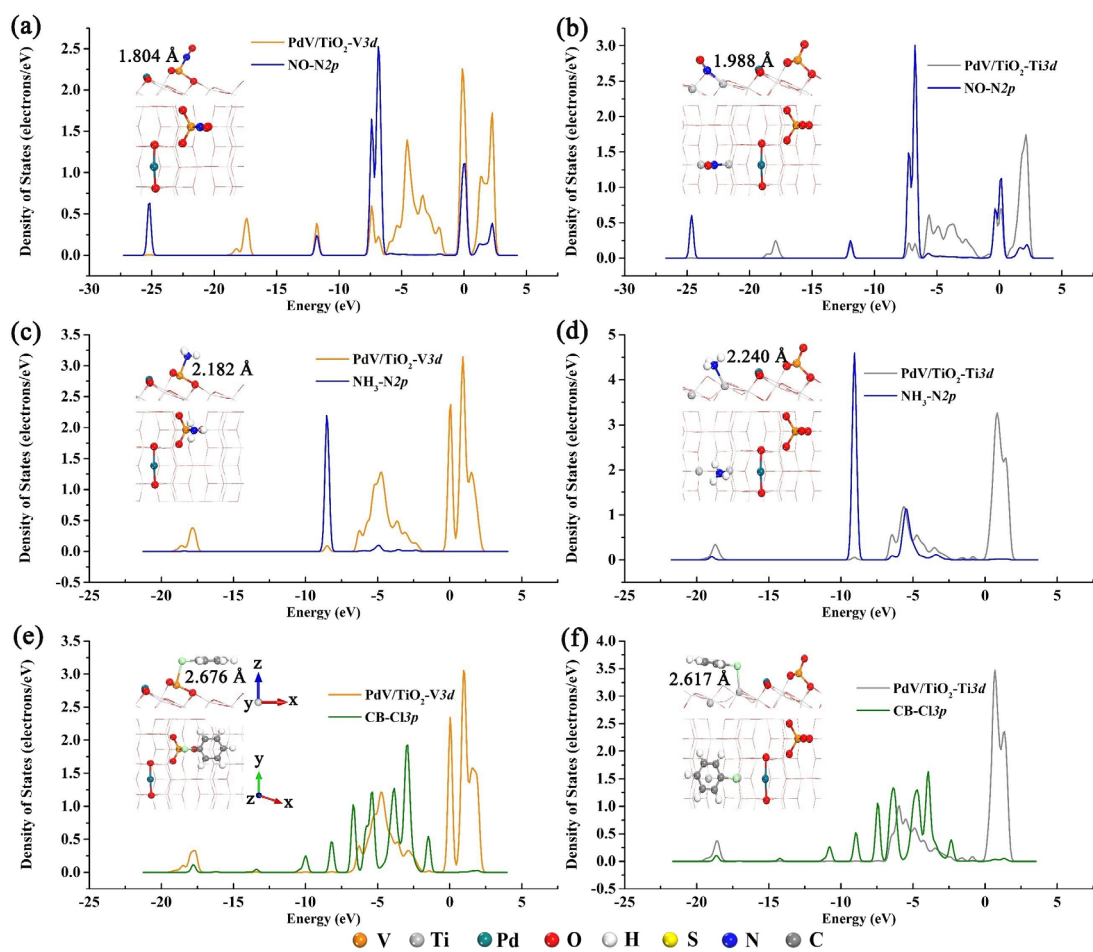

**Fig.S13** Adsorption configuration and PDOS of gas molecules (NO, NH<sub>3</sub> and CB) on the generated two O vacancies (a-f), respectively.

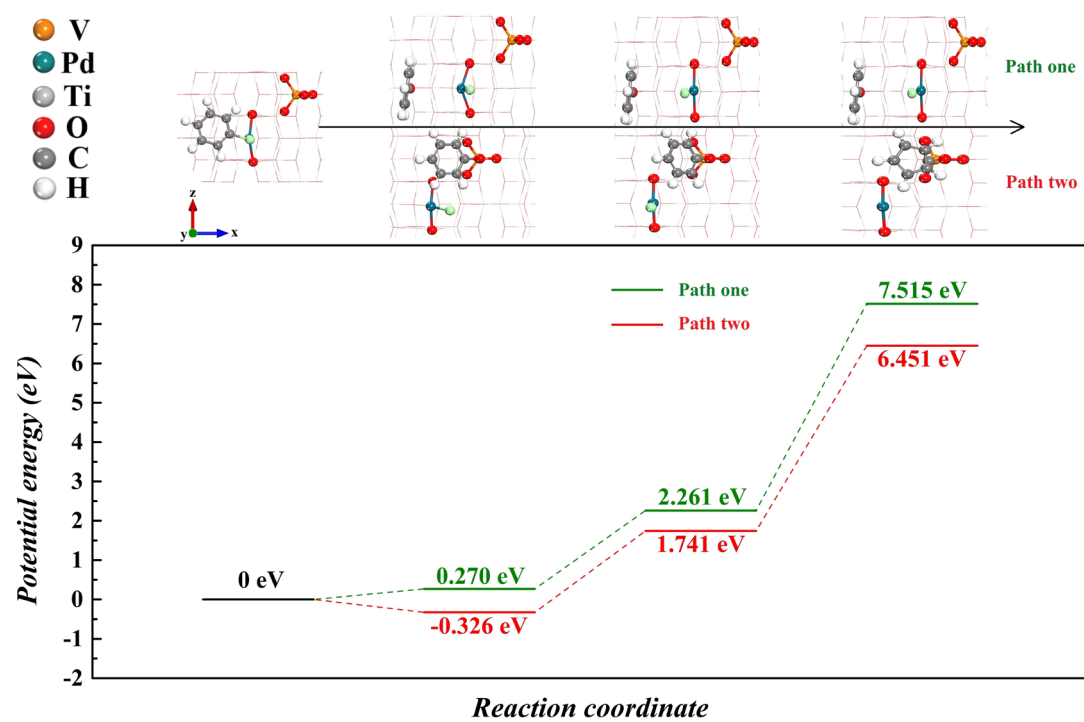

260

261 **Fig.S14** Removal path and energy barrier of CB on the multi-active center catalyst

262 surface.

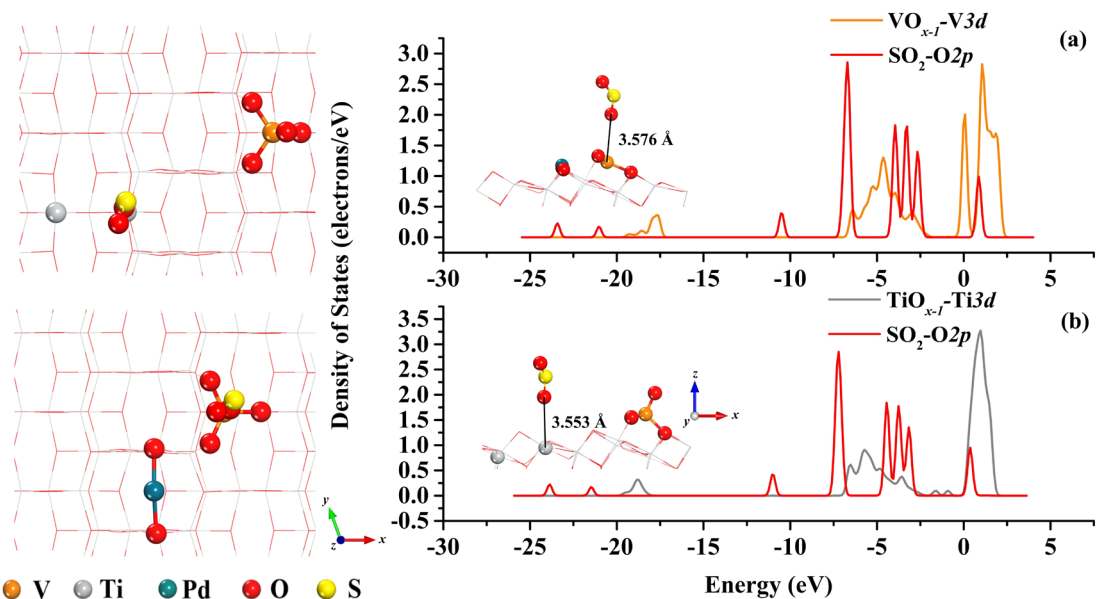

**Fig.S15** Configurations and PDOS for  $\text{SO}_2$  gas molecule adsorption of the two oxygen vacancies (a and b) on the multi-active center catalyst surface.

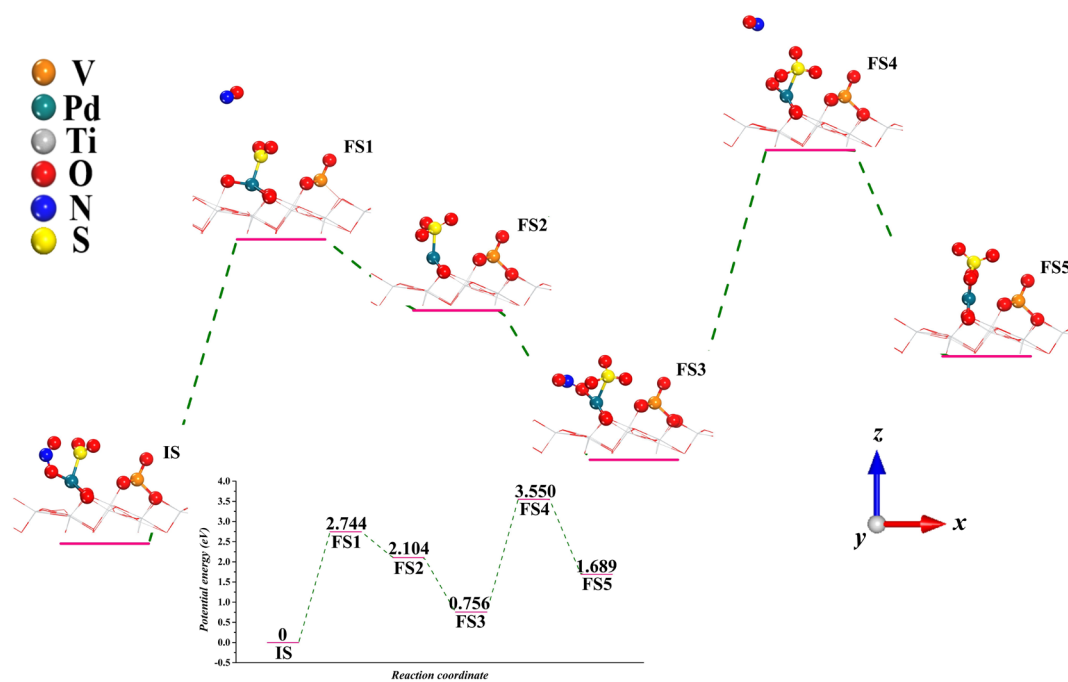

266

267 **Fig.S16** Oxidation path of  $\text{PdSO}_4$  by  $\text{NO}_2$ .

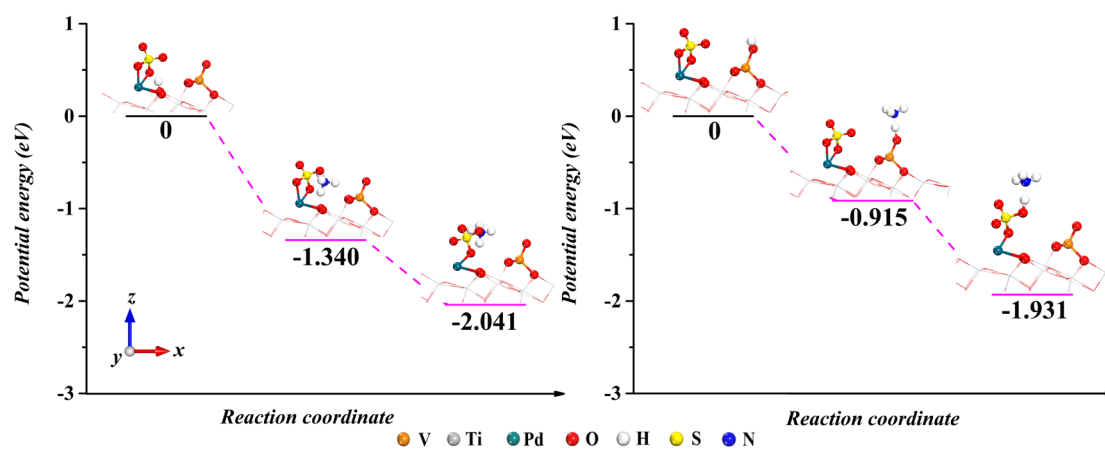

**Fig.S17** Generation path of  $\text{NH}_4\text{SO}_{4\text{ads}}$  on the multi-active center catalyst surface.

## REFERENCES

- (1) Brunauer, S.; Emmett, P. H.; Teller, E., Adsorption of gases in multimolecular layers. *J. Am. Chem. Soc.* **1938**, *60*, 309-319.
- (2) Lippens, B. C.; Linsen, B. G.; Boer, J. H. D., Studies on pore systems in catalysts I. The adsorption of nitrogen; apparatus and calculation. *J. Catal.* **1964**, *3*, 32-37.
- (3) Jain, A.; Hautier, G.; Moore, C. J.; Ong, S. P.; Fischer, C. C.; Mueller, T.; Persson, K. A.; Ceder, G., A High-Throughput infrastructure for density functional theory calculations. *Comp. Mater. Sci.* **2011**, *50*, 2295-2310.
- (4) Sun, P. F.; Zhai, S. Y.; Chen, J. K.; Yuan, J. L.; Wu, Z. B.; Weng, X. L., Development of a multi-active center catalyst in mediating the catalytic destruction of chloroaromatic pollutants: A combined experimental and theoretical study. *Appl. Catal. B* **2020**, *272*, 119015-119023.
- (5) Jiang, B. Q.; Wu, Z. B.; Liu, Y.; Lee, S. C.; Ho, W. K., DRIFT Study of the SO<sub>2</sub> effect on Low-Temperature SCR reaction over FeMn/TiO<sub>2</sub>. *J. Phy. Chem. C* **2010**, *114*, 4961-4965.
- (6) Chang, H. Z.; Chen, X. Y.; Li, J. H.; Ma, L.; Wang, C. Z.; Liu, C. X.; Schwank, J. W.; Hao, J. M., Improvement of activity and SO<sub>2</sub> tolerance of Sn-Modified MnO<sub>x</sub>-CeO<sub>2</sub> catalysts for NH<sub>3</sub>-SCR at low temperatures. *Environ. Sci. Technol.* **2013**, *47*, 5294-5301.
- (7) Huang, H.; Gu, Y. F.; Zhao, J.; Wang, X. Y., Catalytic combustion of chlorobenzene over VO<sub>x</sub>/CeO<sub>2</sub> catalysts. *J. Catal.* **2015**, *326*, 54-68.
- (8) Ma, Z. R.; Wu, X. D.; Si, Z. C.; Weng, D.; Ma, J.; Xu, T. F., Impacts of niobia loading on active sites and surface acidity in NbO<sub>x</sub>/CeO<sub>2</sub>-ZrO<sub>2</sub> NH<sub>3</sub>-SCR catalysts. *Appl. Catal. B* **2015**, *179*, 380-394.
- (9) Huang, H.; Gu, Y. F.; Zhao, J.; Wang, X. Y., Catalytic combustion of chlorobenzene over



292  $\text{VO}_x/\text{CeO}_2$  catalysts. *J. Catal.* **2015**, 326, 54-68.

293 (10) Amores, J. G.; Escribano, V. S.; Ramis, G.; Busca, G., An FT-IR study of ammonia  
294 adsorption and oxidation over Anatase-Supported metal oxides. *Appl. Catal. B* **1997**, 13, 45-58.

295 (11) Liu, J.; Li, X. Y.; Li, R. Y.; Zhao, Q. D.; Ke, J.; Xiao, H. N.; Wang, L. D.; Liu, S. M.; Tade,  
296 M.; Wang, S. B., Facile synthesis of Tube-Shaped Mn-Ni-Ti solid solution and preferable  
297 Langmuir-Hinshelwood mechanism for selective catalytic reduction of  $\text{NO}_x$  by  $\text{NH}_3$ . *Appl.*  
298 *Catal. A* **2018**, 549, 289-301.

299 (12) Larrubia, M. A.; Busca, G., An FT-IR study of the conversion of 2-chloropropane, o-  
300 dichlorobenzene and dibenzofuran on  $\text{V}_2\text{O}_5$   $\text{MoO}_3$ - $\text{TiO}_2$  SCR-De $\text{NO}_x$  catalysts. *Appl. Catal. B*  
301 **2002**, 39, 343-352.

302 (13) Yan F. P.; Wang Y. H.; Zhang J. Y.; Lin Z.; Sheng, Z. J., Schottky or ohmic Metal-  
303 Semiconductor contact: Influence on photocatalytic efficiency of Ag/ZnO and Pt/ZnO model  
304 systems. *Chemsuschem* **2014**, 7, 101-104.

305 (14) Liu, J. F.; Yu, Y. B.; Mu, Y. J.; He, H., Mechanism of heterogeneous oxidation of carbonyl  
306 sulfide on  $\text{Al}_2\text{O}_3$ : An in situ diffuse reflectance infrared fourier transform spectroscopy  
307 investigation. *J. Phys. Chem. B* **2006**, 110, 3225-3230.

308 (15) Hetrick, C. E.; Lichtenberger, J.; Amiridis, M. D., Catalytic oxidation of chlorophenol over  
309  $\text{V}_2\text{O}_5/\text{TiO}_2$  catalysts. *Appl. Catal. B* **2008**, 77, 255-263.

310 (16) Chen, Z. H.; Yang, Q.; Hua, L.; Li, X. H.; Tsang, S. C., Cr- $\text{MnO}_x$  Mixed-Oxide catalysts  
311 for selective catalytic reduction of  $\text{NO}_x$  with  $\text{NH}_3$  at low temperature. *J. Catal.* **2012**, 276, 56-  
312 65.
